# Supplementary material for: Monoclonal Antibodies Directed against Cadherin RGD Exhibit Therapeutic Activity against Melanoma and Colorectal Cancer Metastasis
Source: Oxford University Press journal article supplement (doi:10.1158/1078-0432.ccr-17-1444), 2017-09-15
Supplement: 10780432ccr171444-sup-183575_2_supp_4237550_2v2047.docx [file 10780432ccr171444-sup-183575_2_supp_4237550_2v2047.docx]

**Table S1. Characterization of anti-CDH17 RGD mAbs**

| **Mab** | **Isotype** | **Indirect ELISA vs CDH17 dom 6 (*E.coli*)** | **Indirect ELISA vs BSA-peptide** |
| --- | --- | --- | --- |
| PA383-**6.5.2** | IgG1 kappa | 1.05 | 0.68 |
| PA383-**6.6.1** | IgG1 kappa | 1.5 | 0.48 |
| PA383-**12.4.1** | IgG1-2a/Kappa-Lambda | 0.45 | 0.49 |
| PA383-**25.4.1** | Mixed isotype | 0.3 | 0.19 |
